# Supplementary figures and images for: Enhanced Redifferentiation of Chondrocytes on Microperiodic Silk/Gelatin Scaffolds: Toward Tailor-Made Tissue Engineering
Source: Atypon-hosted journal article supplement (doi:10.1021/bm301193t), 2013-01-10

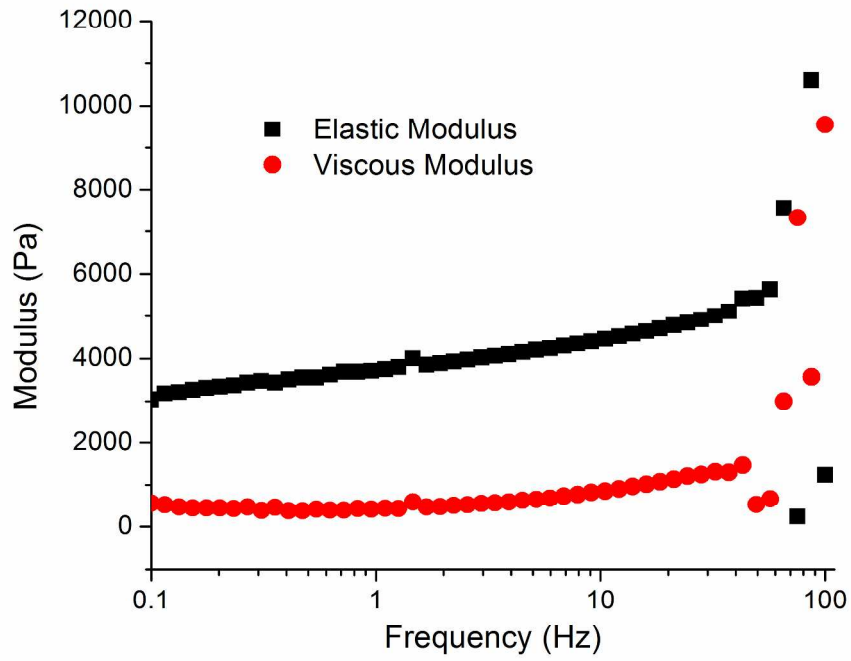

268x205mm (300 x 300 DPI)

Supplement: bm301193t_si_001.pdf [file bm301193t_si_001.pdf]
